# Supplementary material for: The miR-106b/NR2F2-AS1/PLEKHO2 Axis Regulates Migration and Invasion of Colorectal Cancer through the MAPK Pathway
Source: MDPI journal article supplement (doi:10.3390/ijms22115877), 2021-05-30
Supplement: s1 [file s1]

Supplementary figure 1

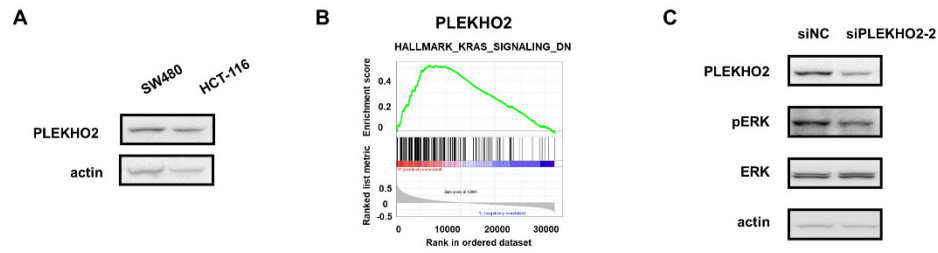

**Supplementary figure 1.** PLEKHO2 affect the MAPK pathway in CRC. (A) Western blot showed that the protein level of PLEKHO2 is a little higher in SW480 cells than in HCT-116 cells. (B) The GSEA results showed “HALLMARK\_KRAS\_SIGNALING\_DN” was significantly enriched in the high levels of PLEKHO2. (C) Western blot showed that transfection of siPLEKHO2 suppresses the phosphorylation of ERK.
